# Supplementary material
Source: ML conference proceedings conference paper supplement (https://proceedings.neurips.cc/paper_files/paper/2019/hash/d0010a6f34908640a4a6da2389772a78-Abstract.html)
Supplement: Supplementary file [file d0010a6f34908640a4a6da2389772a78-Supplemental.zip]

---

# Supplementary Material for Data-driven Estimation of Sinusoid Frequencies

---

## 1 Loss of resolution due to truncation in time

The loss of resolution caused by sampling over a finite interval becomes apparent when we compute the discrete-time Fourier transform (DTFT) of the truncated samples. The DTFT of  $N$  samples of the multisinusoidal signal in equation 1, denoted by  $S_N$ , equals:

$$\text{DTFT}(S_N)(f) := \sum_{k=1}^N S(k) \exp(-i2\pi k f) \quad (1)$$

$$= \sum_{k=1}^N \sum_{j=1}^m a_j \exp(i2\pi k f_j) \exp(-i2\pi k f) \quad (2)$$

$$= \sum_{j=1}^m a_j D_N(f - f_j), \quad D_N(f) := \sum_{k=1}^N \exp(-i2\pi k f). \quad (3)$$

The kernel  $D_N$  is called a discretized sinc or Dirichlet kernel in the literature. As  $N \rightarrow \infty$   $D_N(f)$  converges to a Dirac measure, which provides infinite resolution: the DTFT of the signal consists of Dirac deltas centered exactly at the frequencies. For finite  $N$  the DTFT of the samples is equal to the convolution between the DTFT of the signal and the kernel  $D_N$ . This is illustrated with a simple example in Figure 1. The width of the main lobe of  $D_N$  equals  $1/N$ , which can be interpreted as the frequency resolution of the samples.

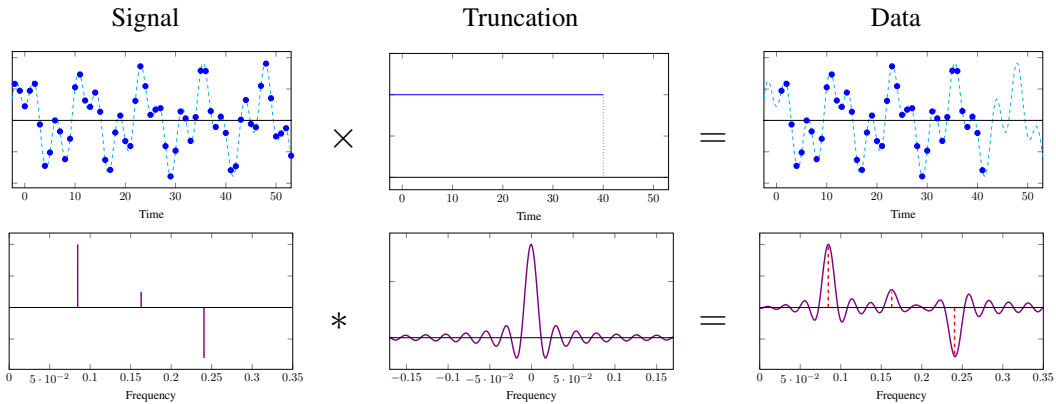

Figure 1: Illustration of the frequency-estimation problem. Truncation in the time domain is equivalent to convolving with a blurring kernel in the frequency domain, which limits the frequency resolution of the data.

## 2 Standard error bars for frequency-estimation results

Figure 2 shows the frequency-estimation results of DeepFreq with standard error bars for the experiment described in Section 3.4 of the main paper.

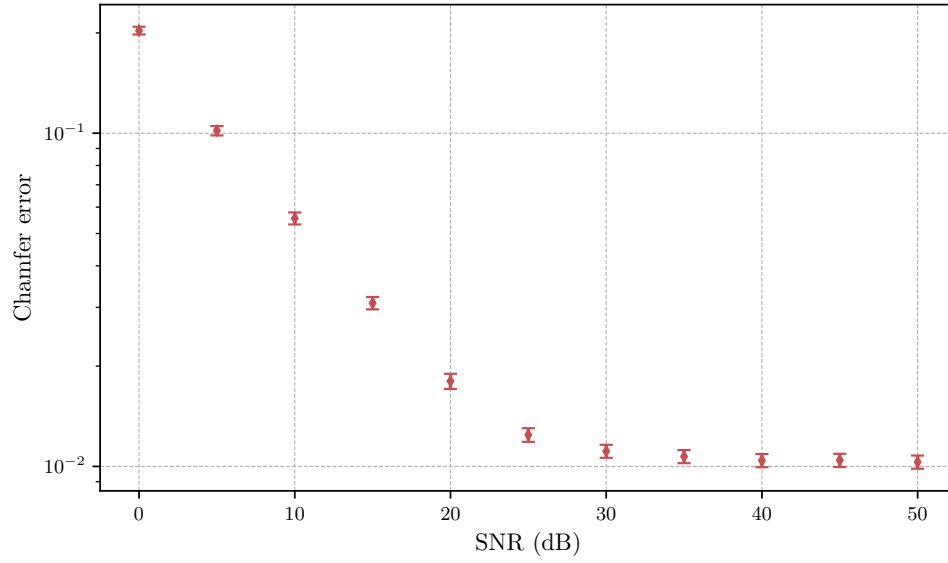

Figure 2: Frequency-estimation results of DeepFreq with standard error bars.
